# Supplementary material for: Improving Properties of Starch-Based Adhesives with Carboxylic Acids and Enzymatically Polymerized Lignosulfonates
Source: MDPI journal article supplement (doi:10.3390/ijms232113547), 2022-11-04
Supplement: s1 [file s1]

# Improving properties of starch-based adhesives with carboxylic acids and enzymatically polymerized lignosulfonates.

Miguel Jimenez Bartolome <sup>1,\*</sup>, Sidhant Satya Prakash Padhi <sup>1</sup>, Oliver Gabriel Fichtberger <sup>1</sup>, Nikolaus Schwaiger <sup>2</sup>, Bernhard Seidl <sup>3</sup>, Martin Kozich <sup>3</sup>, Gibson S. Nyanhongo <sup>1,4</sup> and Georg M. Guebitz <sup>1</sup>

<sup>1</sup> Institute of Environmental Biotechnology, University of Natural Resources and Life Sciences, Vienna, Konrad Lorenz Strasse 20, 3430 Tulln an der Donau, Austria

<sup>2</sup> Sappi Papier Holding GmbH, Bruckerstrasse 21, 8101 Gratkorn, Austria

<sup>3</sup> Agrana Research & Innovation Center GmbH, Josef Reitherstraße 21–23, 3430 Tulln, Austria

<sup>4</sup> Department of Biotechnology and Food Technology, Faculty of Science, University of Johannesburg, Corner Siemert and Louisa, Doornfontein, John Orr Building, 2028 Johannesburg, South Africa

\* Correspondence: miguel.jimenez-bartolome@boku.ac.at

## Characterization of laccase polymerized lignosulfonates.

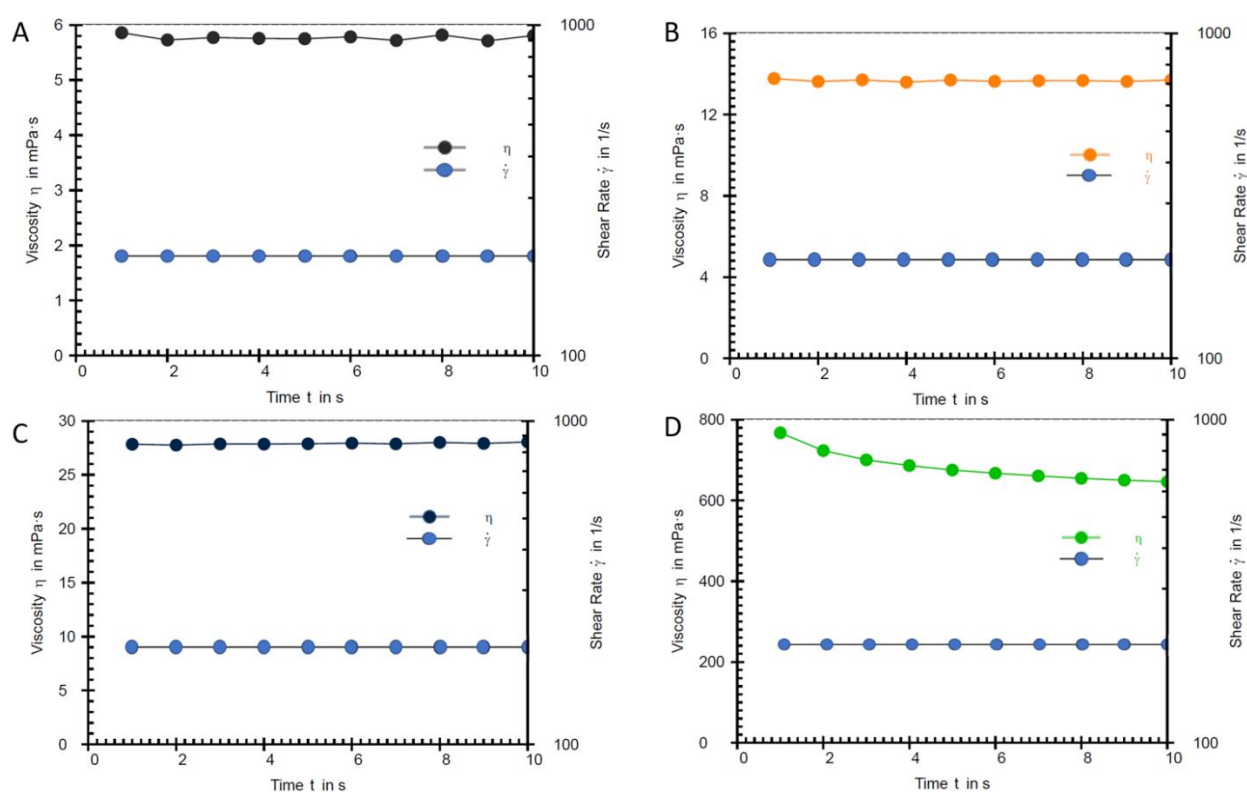

**Figure S1.** Viscosity curves of the different time-points of the lignosulfonate polymerization: 0 min (A), 20 min (B), 50 min (C) and 90 min (D). The viscosity is presented in mPa·s and the shear rate in 1/s. The shear rate was constant in all the measurements.

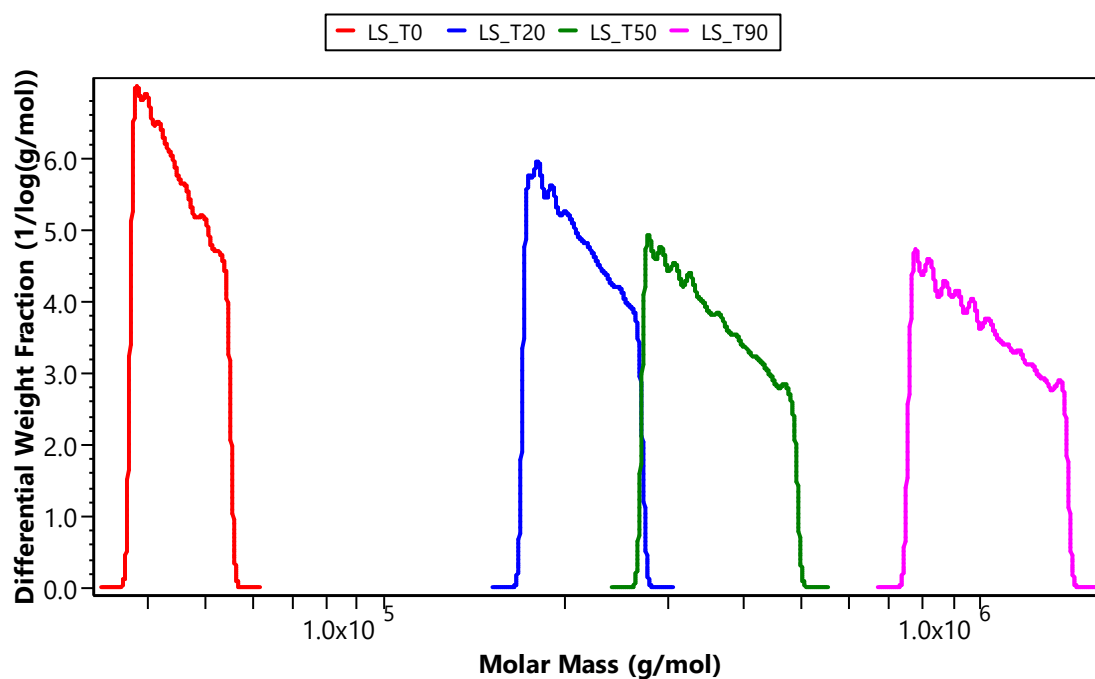

**Figure S2.** Molecular mass of the lignosulfonate polymerization obtained by size exclusion chromatography (SEC). In the figure, the molar masses of different time-points of the reactions are presented (from left to right: 0, 20, 50 and 90 minutes).
